# Supplementary material
Source: Springer Nature journal article supplement (https://www.springermedizin.de/resource/supplementary/12985_2010_967_MOESM4_ESM.pdf/9608846)

**A**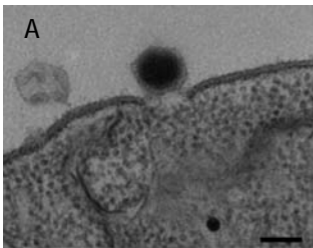**B**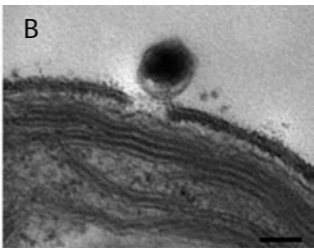**C**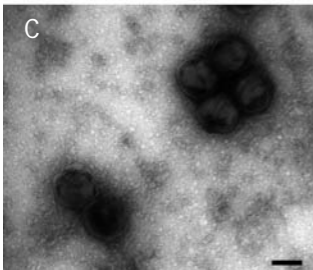**D**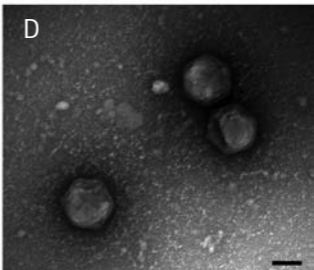

Supplement: MOESM4 [file 9608846]
